# Supplementary material for: Triple nanocomposites of CoMn2O4, Co3O4 and reduced graphene oxide for oxidation of aromatic alcohols
Source: Royal Society of Chemistry journal article supplement (doi:10.1039/c3cy01025b), 2014-01-01
Supplement: c3cy01025b1.pdf [file c3cy01025b1.pdf]

### Electronic Supplementary Information (ESI)

#### Triple nano-composites of $\text{CoMn}_2\text{O}_4$ , $\text{Co}_3\text{O}_4$ and reduced graphene oxide for oxidation of aromatic alcohols

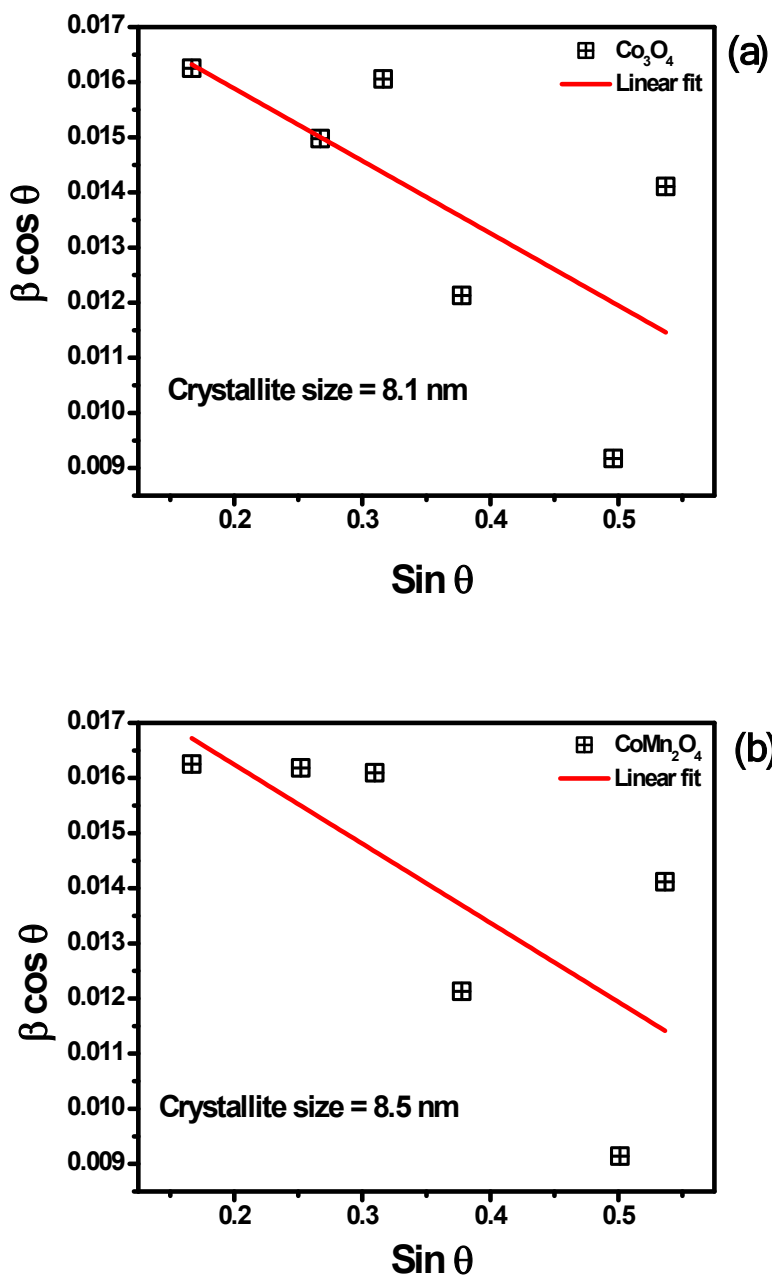

**Fig. S1** Williamson-Hall analysis for crystallite size measurement of  $\text{Co}_3\text{O}_4$  (a) and  $\text{CoMn}_2\text{O}_4$  (b) phases present in RGO-MnCoO.

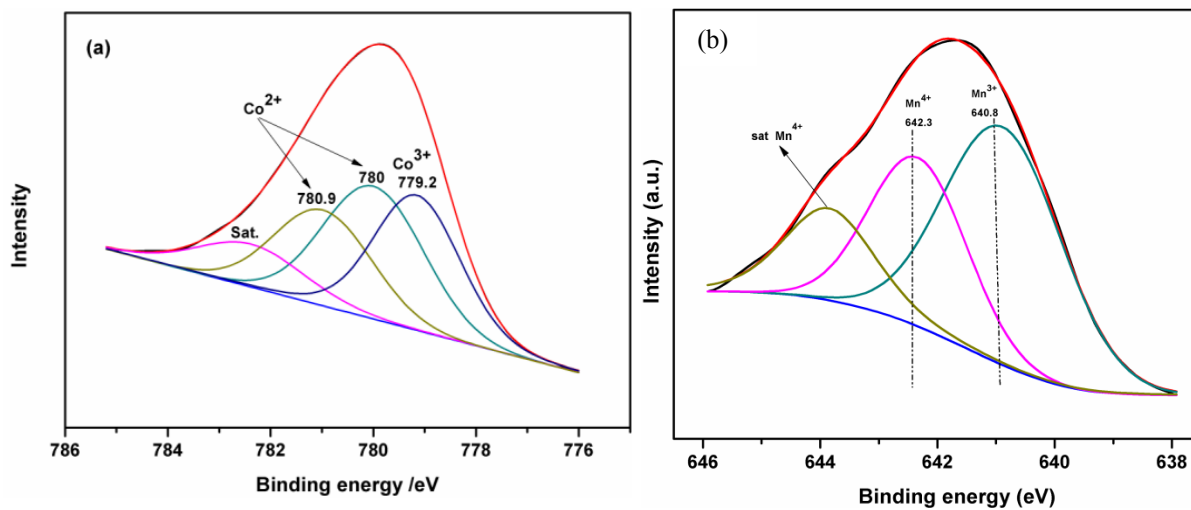

Fig. S2 XPS of Co 2p<sub>3/2</sub> and Mn 2p<sub>3/2</sub> of MnCo-MO.

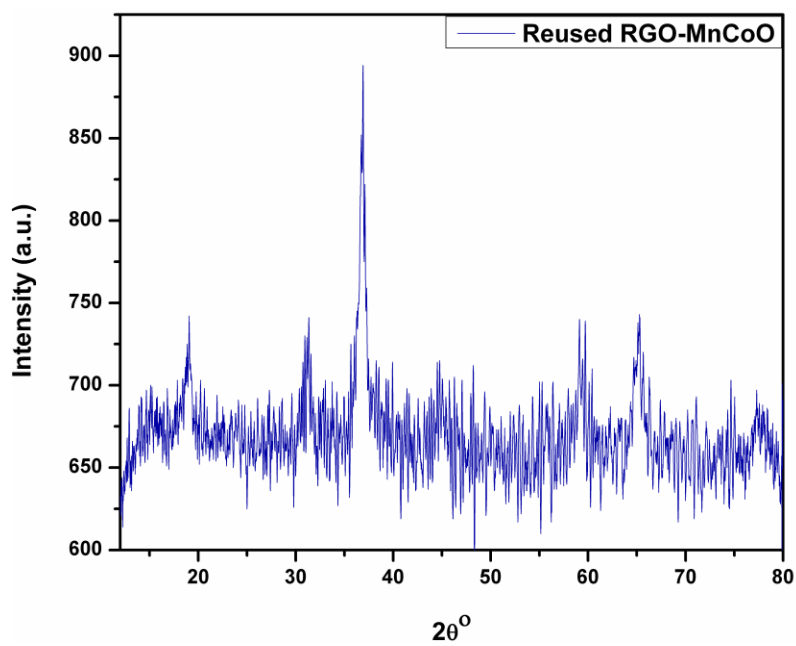

Fig. S3 XRD patterns of reused RGO-MnCoO catalyst.

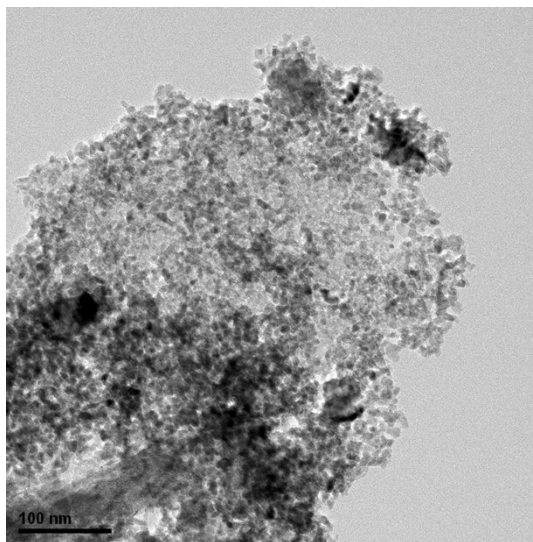

**Fig. S4** HR-TEM image of reused RGO-MnCoO catalyst.

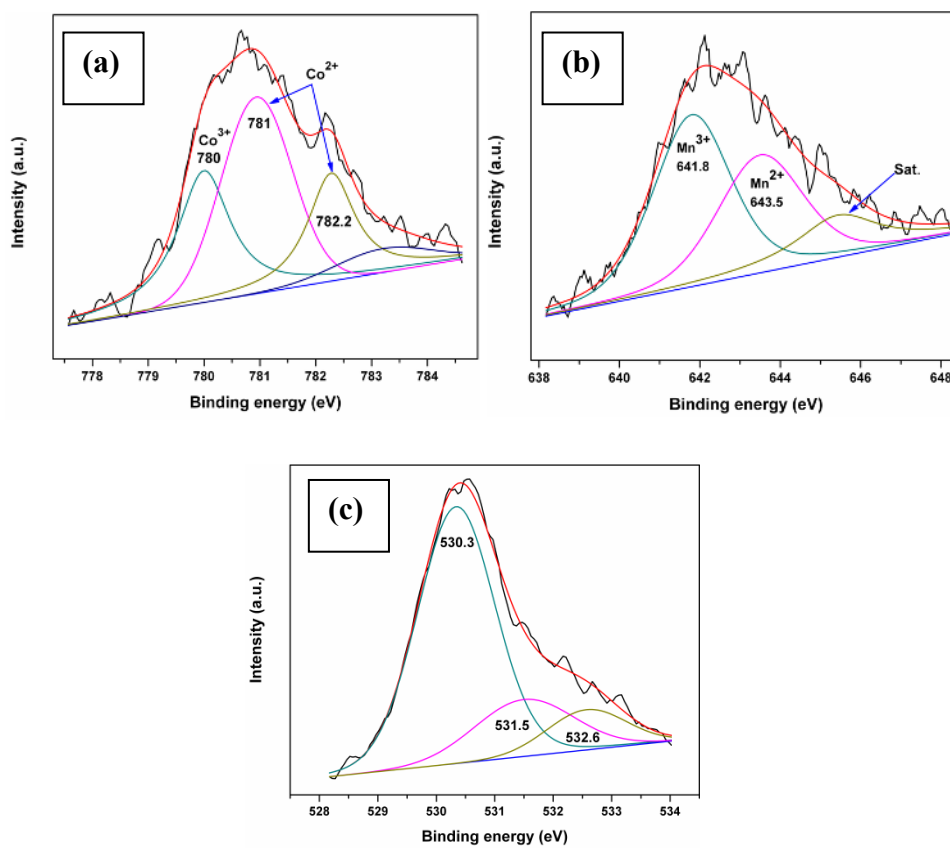

**Fig. S5** XPS plots of (a) Co 2p<sub>3/2</sub>, (b) Mn 2p<sub>3/2</sub> and (c) O1s of reused RGO-MnCoO catalyst.
